# Supplementary material for: Hepatic resection alone versus in combination with pre- and post-operative transarterial chemoembolization for the treatment of hepatocellular carcinoma: A systematic review and meta-analysis
Source: PubMed Central journal article supplement (PMC4742214; doi:10.18632/oncotarget.5426), 2015-10-05
Supplement: oncotarget-06-36838-s001.pdf [file oncotarget-06-36838-s001.pdf]

SUPPLEMENTARY FIGURES AND TABLES

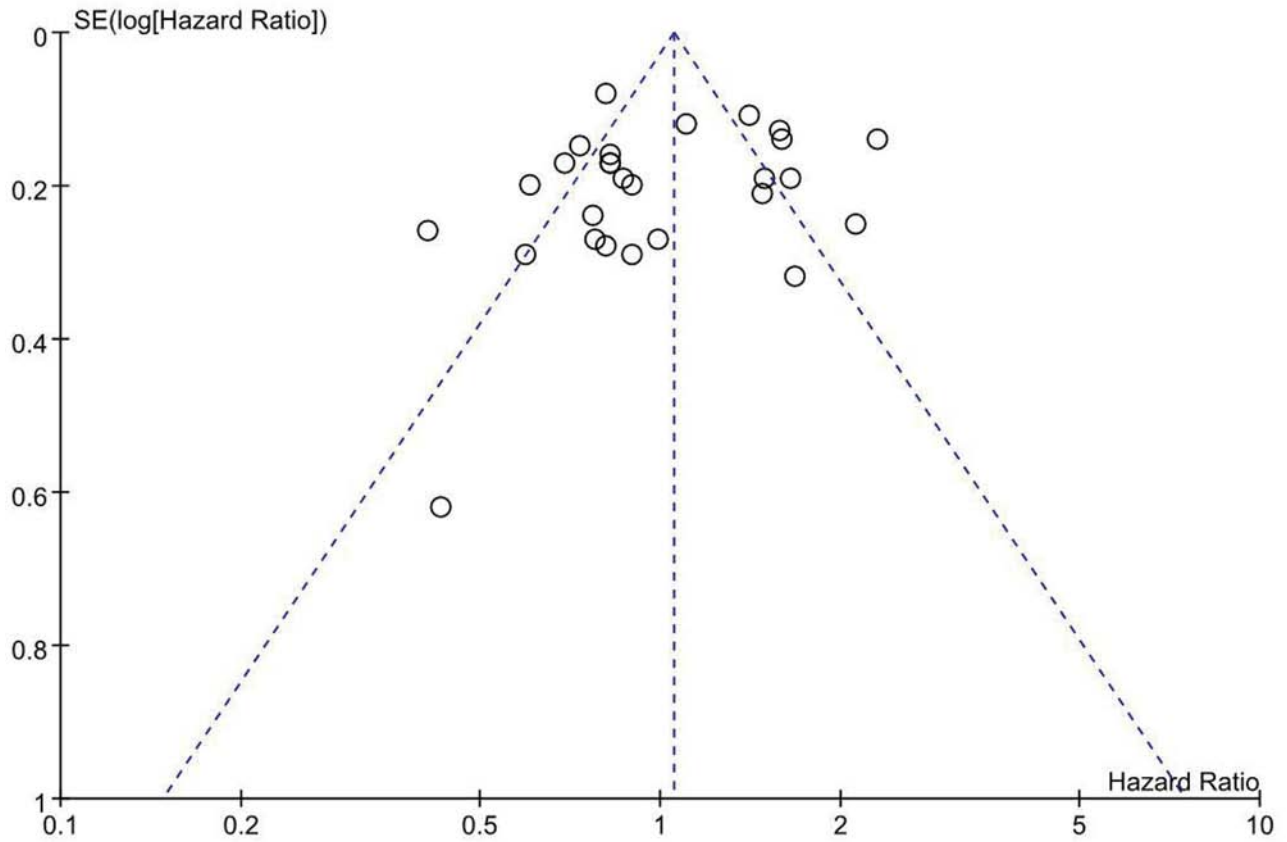

Supplementary Figure S1: Funnel plot regarding the comparison of overall survival between hepatic resection with and without pre-operative TACE groups.

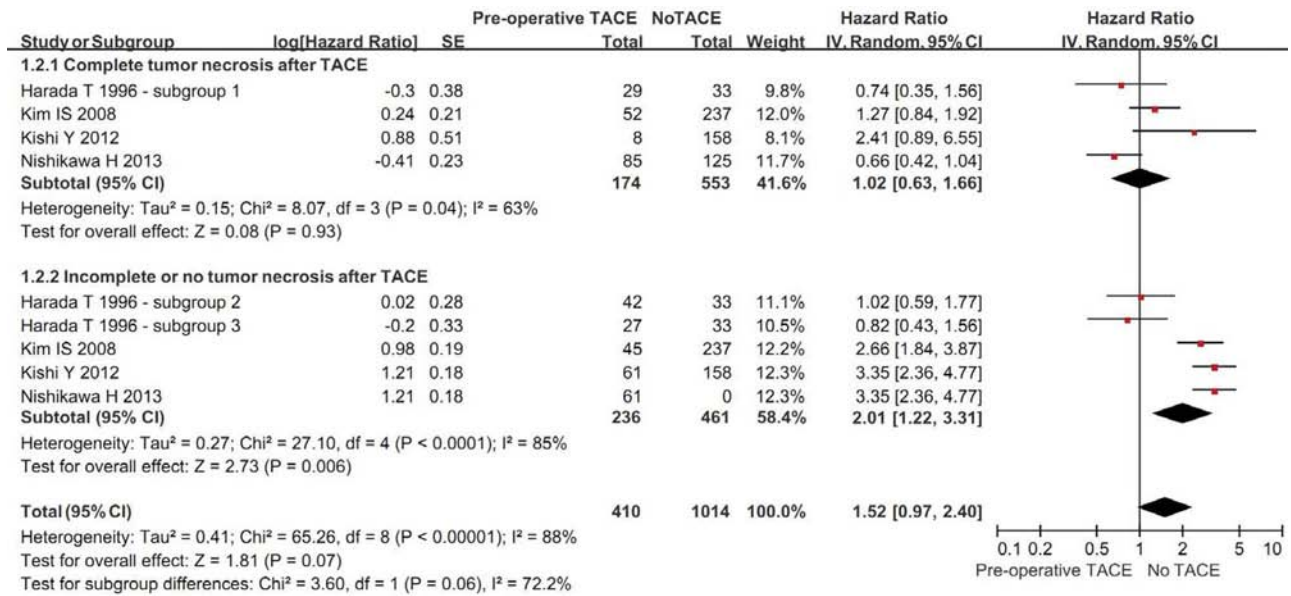

**Supplementary Figure S2: Subgroup meta-analysis comparing the overall survival between hepatic resection with and without pre-operative TACE groups according to the tumor necrosis.**

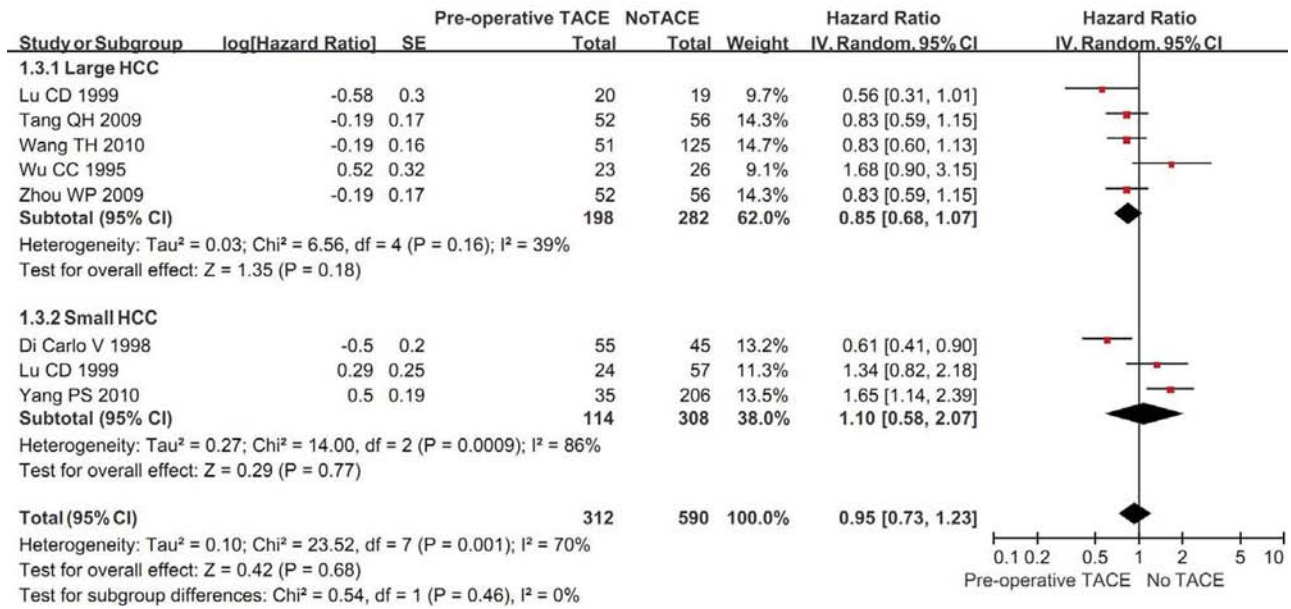

Supplementary Figure S3: Subgroup meta-analysis comparing the overall survival between hepatic resection with and without pre-operative TACE groups according to the tumor size.

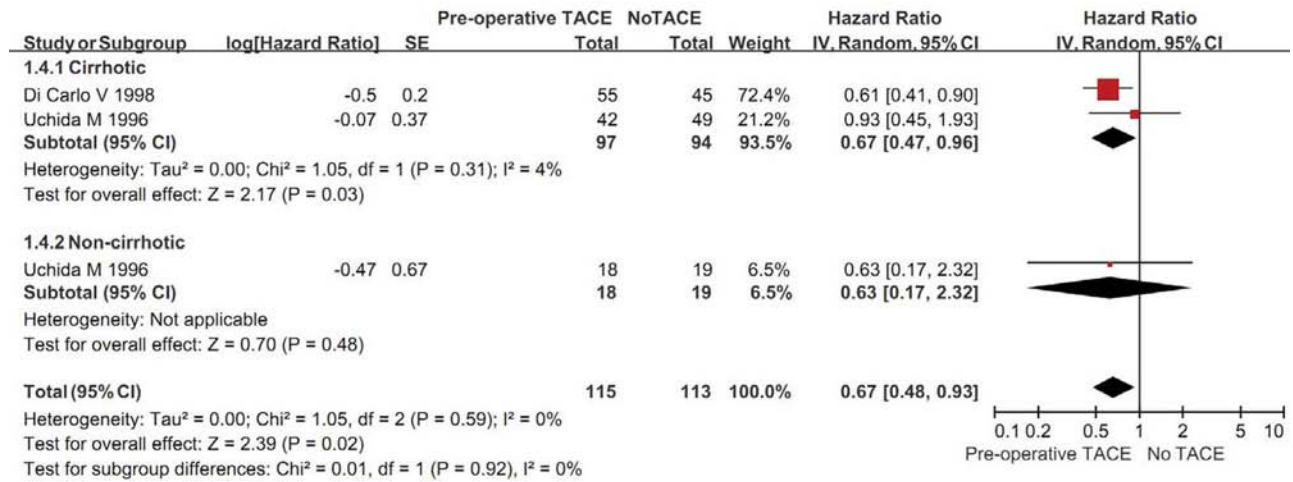

**Supplementary Figure S4: Subgroup meta-analysis comparing the overall survival between hepatic resection with and without pre-operative TACE groups according to the presence of liver cirrhosis.**

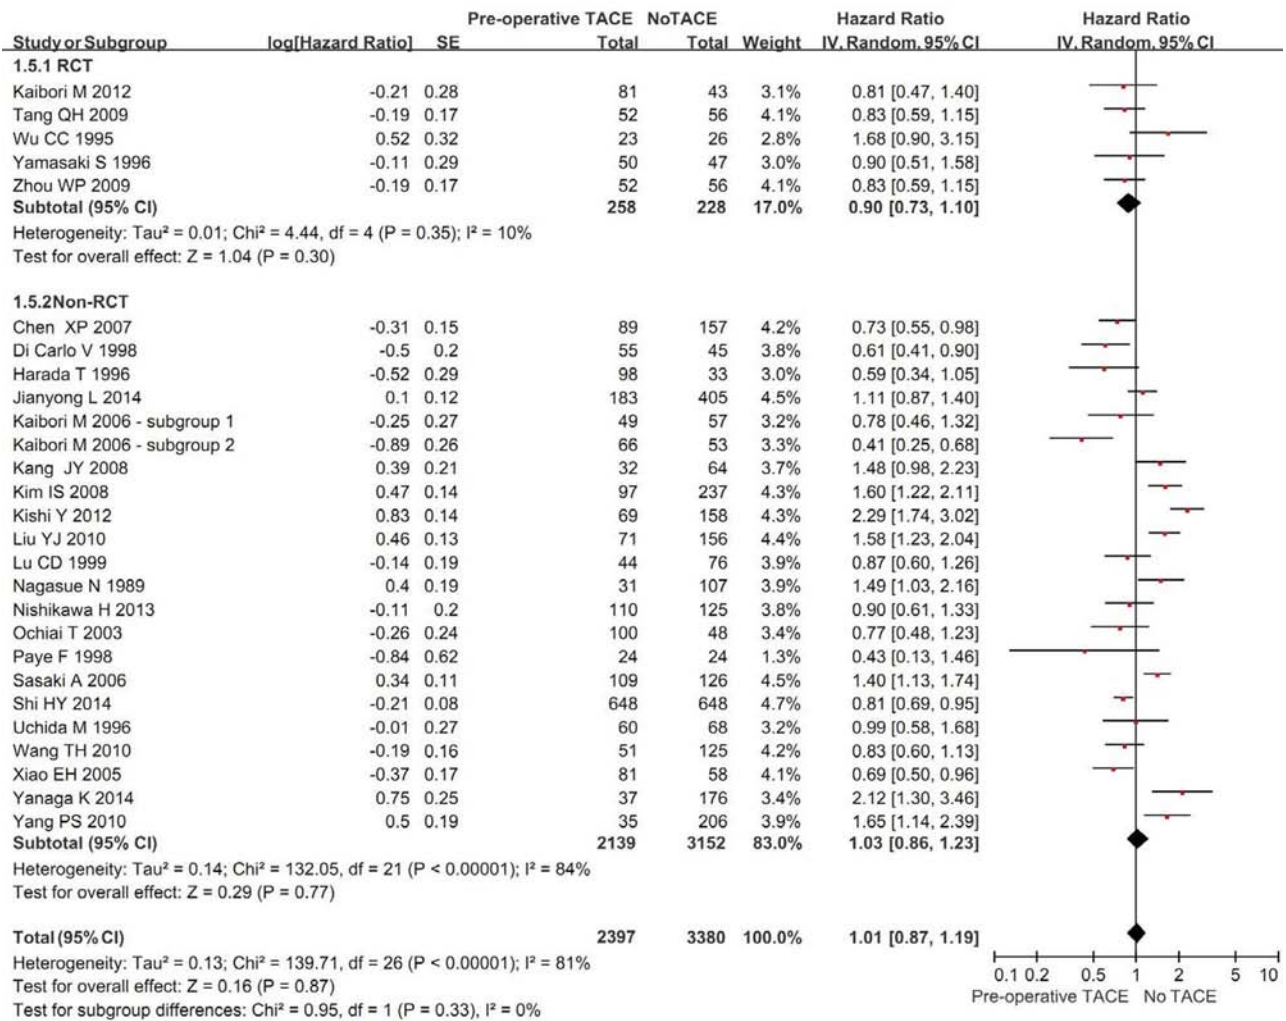

Supplementary Figure S5: Subgroup meta-analysis comparing the overall survival between hepatic resection with and without pre-operative TACE groups according to the study design.

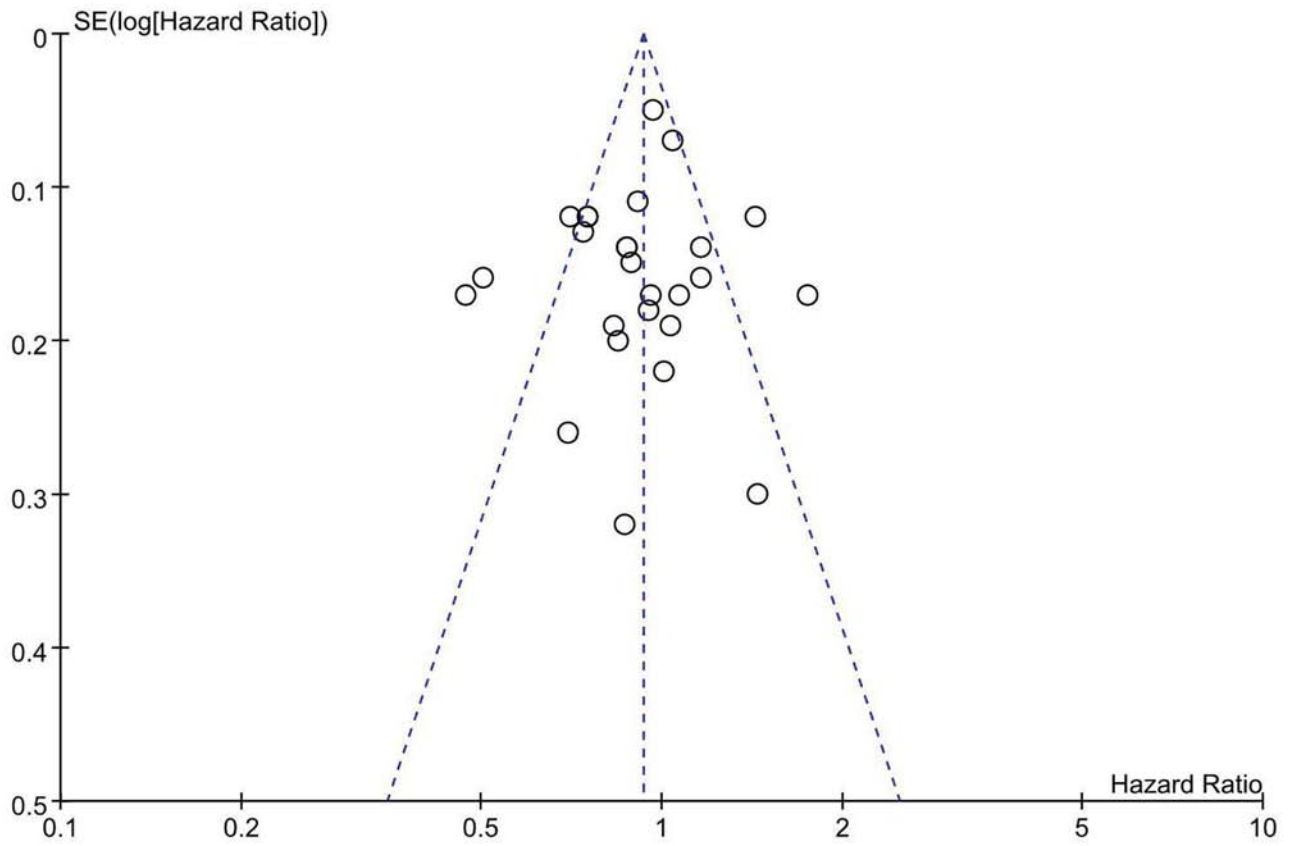

Supplementary Figure S6: Funnel plot regarding the comparison of disease-free survival between hepatic resection with and without pre-operative TACE groups.

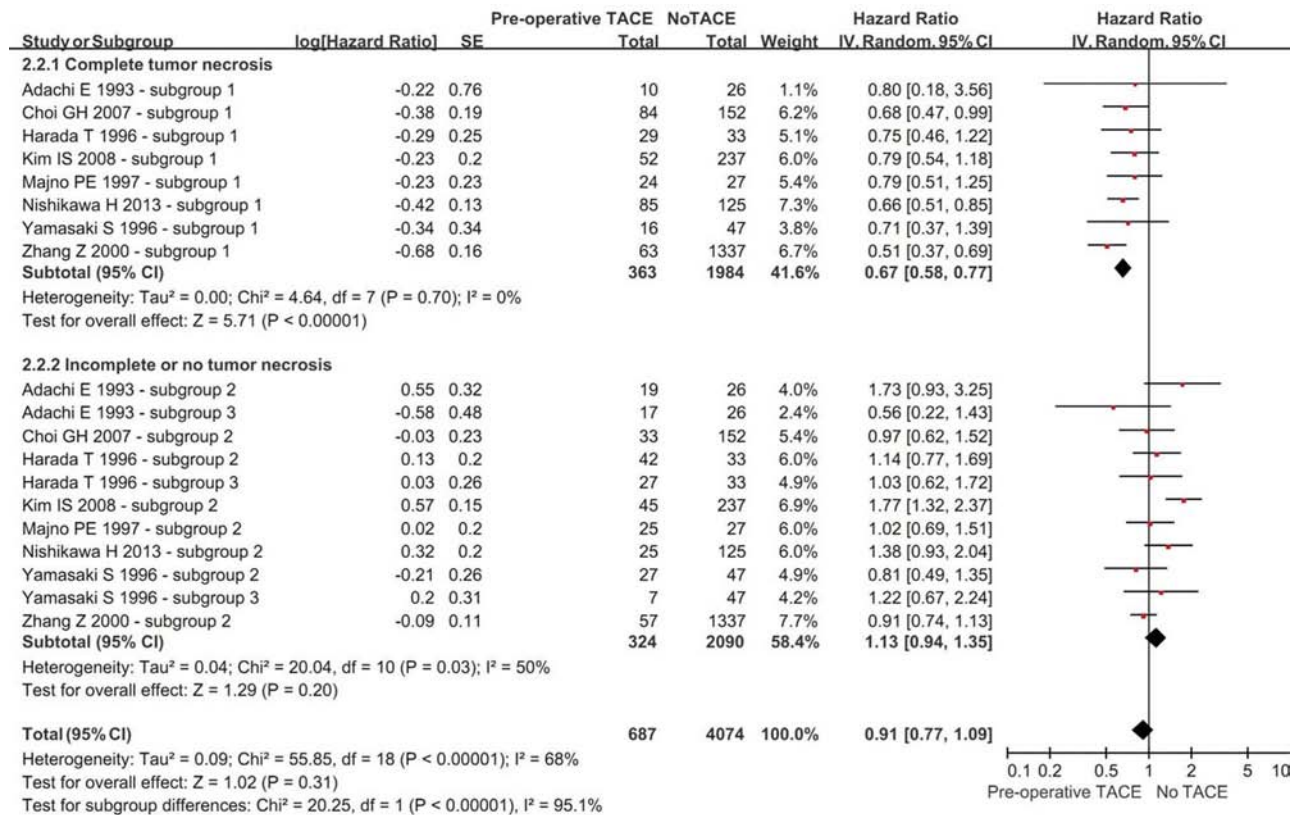

Supplementary Figure S7: Subgroup meta-analysis comparing the disease-free survival between hepatic resection with and without pre-operative TACE groups according to the tumor necrosis.



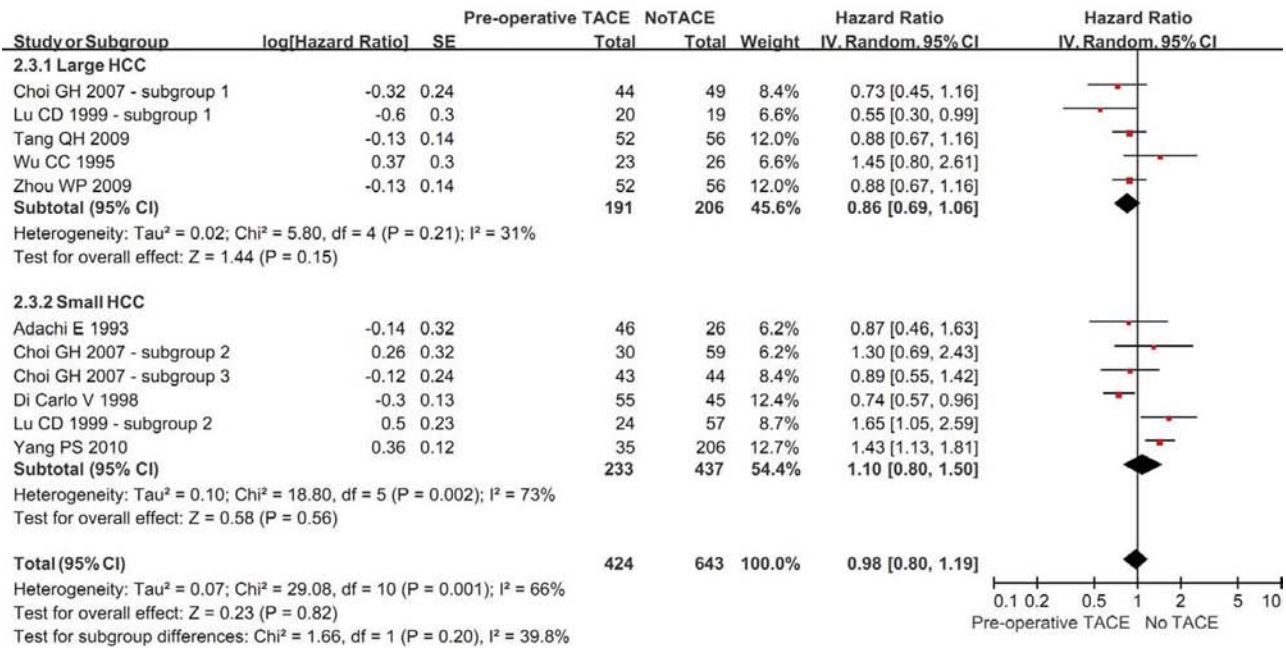

**Supplementary Figure S8: Subgroup meta-analysis comparing the disease-free survival between hepatic resection with and without pre-operative TACE groups according to the tumor size.**



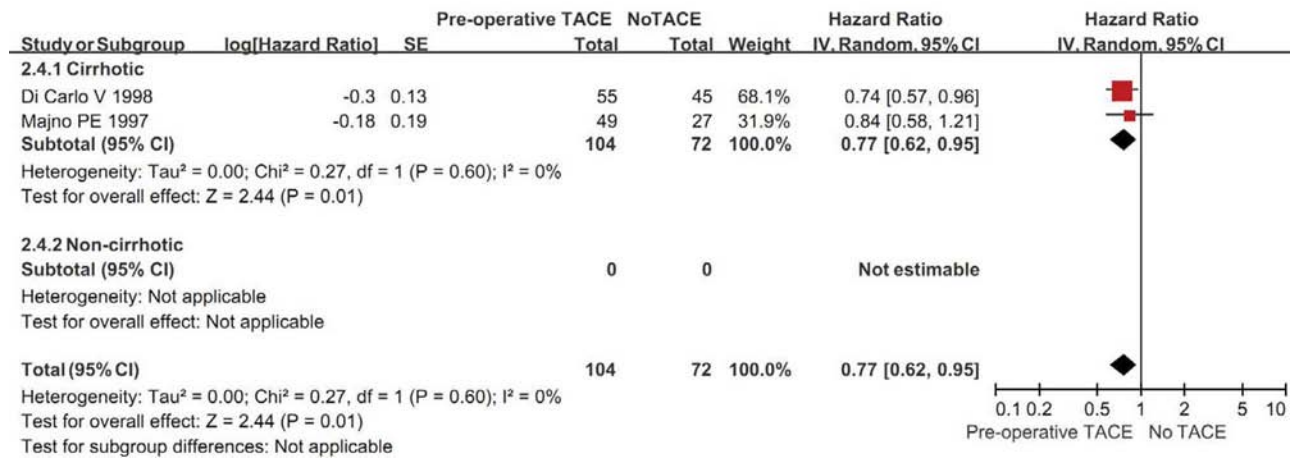

**Supplementary Figure S9: Subgroup meta-analysis comparing the disease-free survival between hepatic resection with and without pre-operative TACE groups according to the presence of liver cirrhosis.**

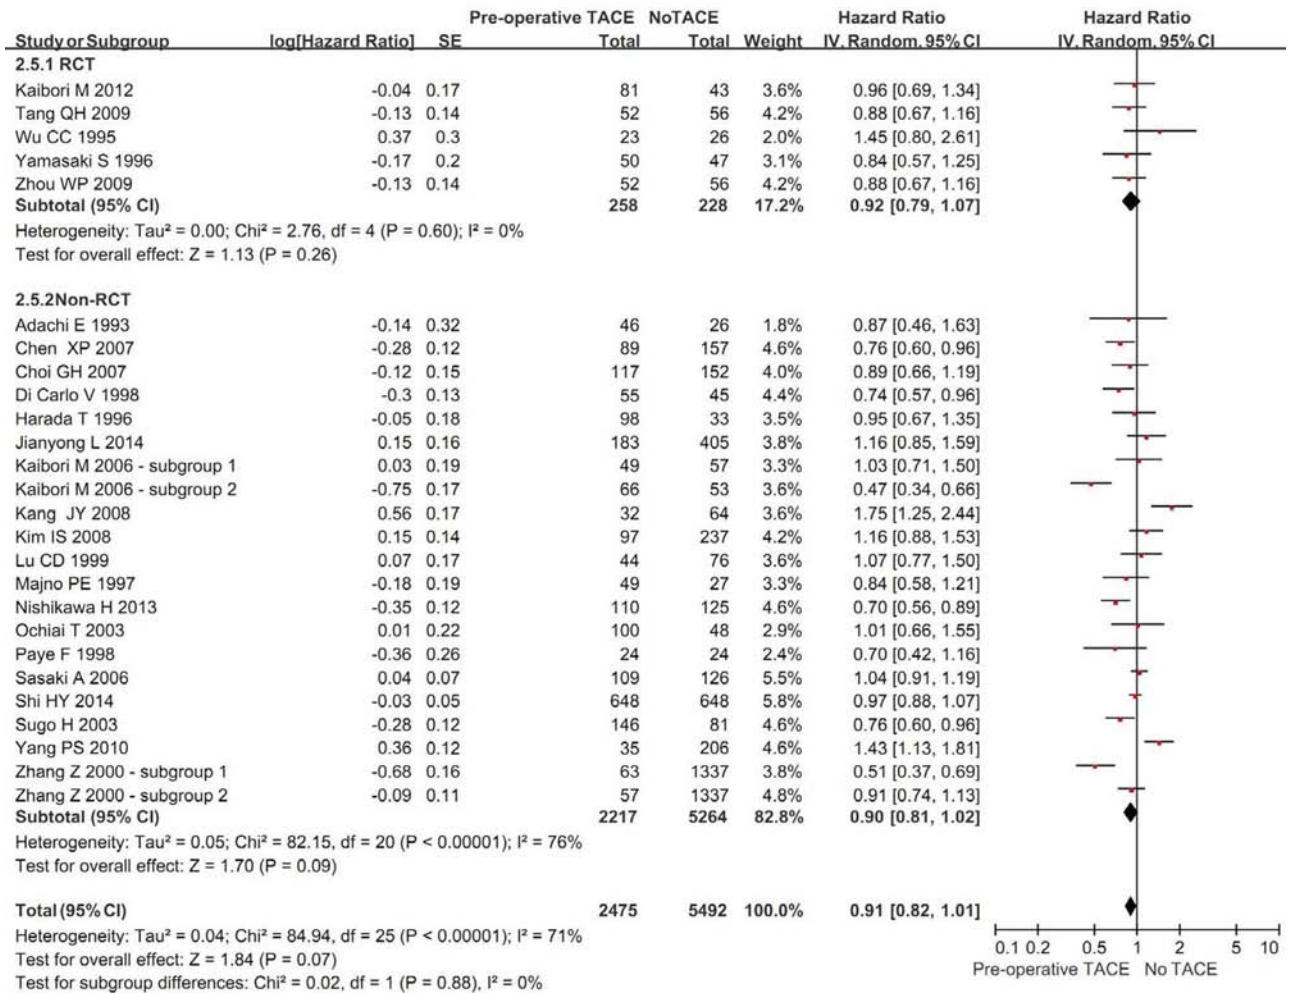

Supplementary Figure S10: Subgroup meta-analysis comparing the disease-free survival between hepatic resection with and without pre-operative TACE groups according to the study design.

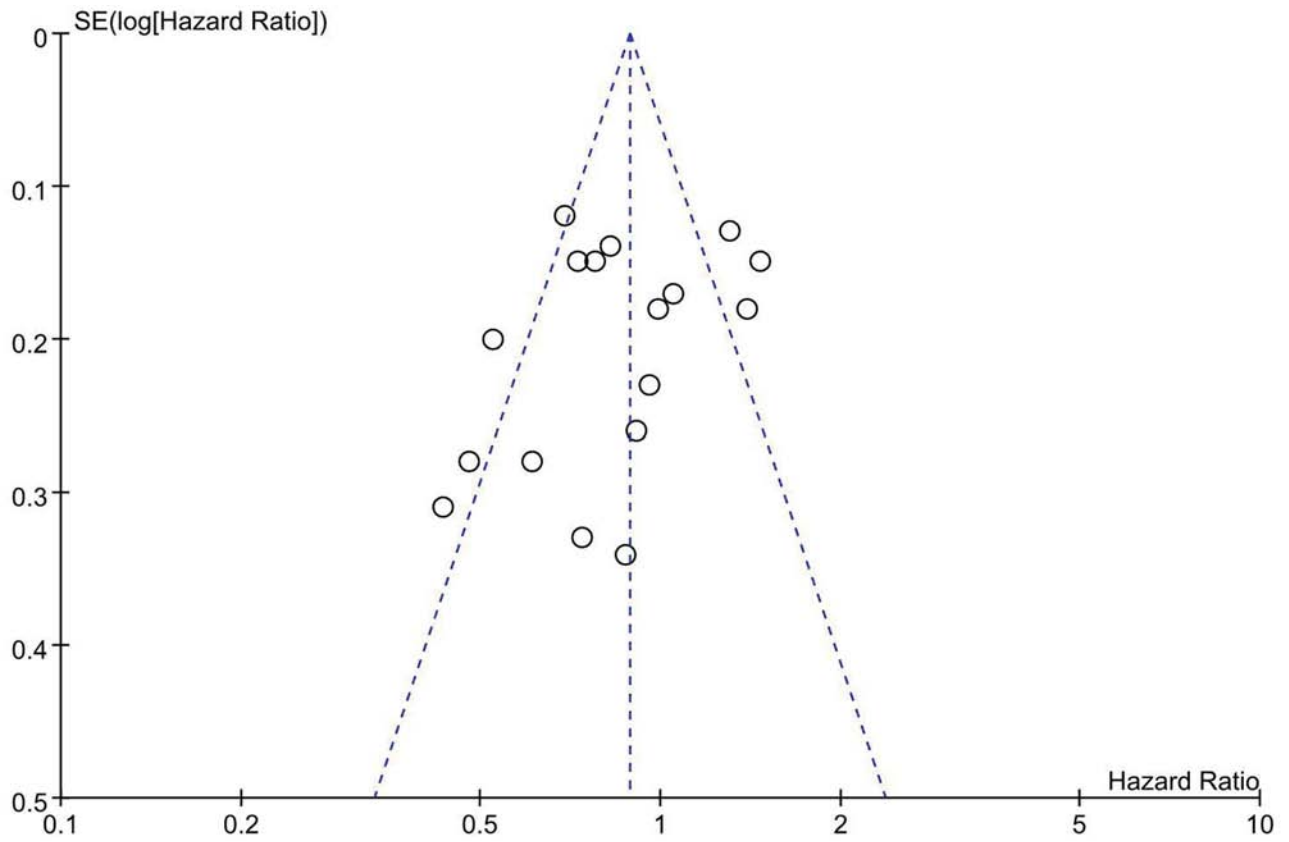

Supplementary Figure S11: Funnel plot regarding the comparison of overall survival between hepatic resection with and without post-operative TACE groups.

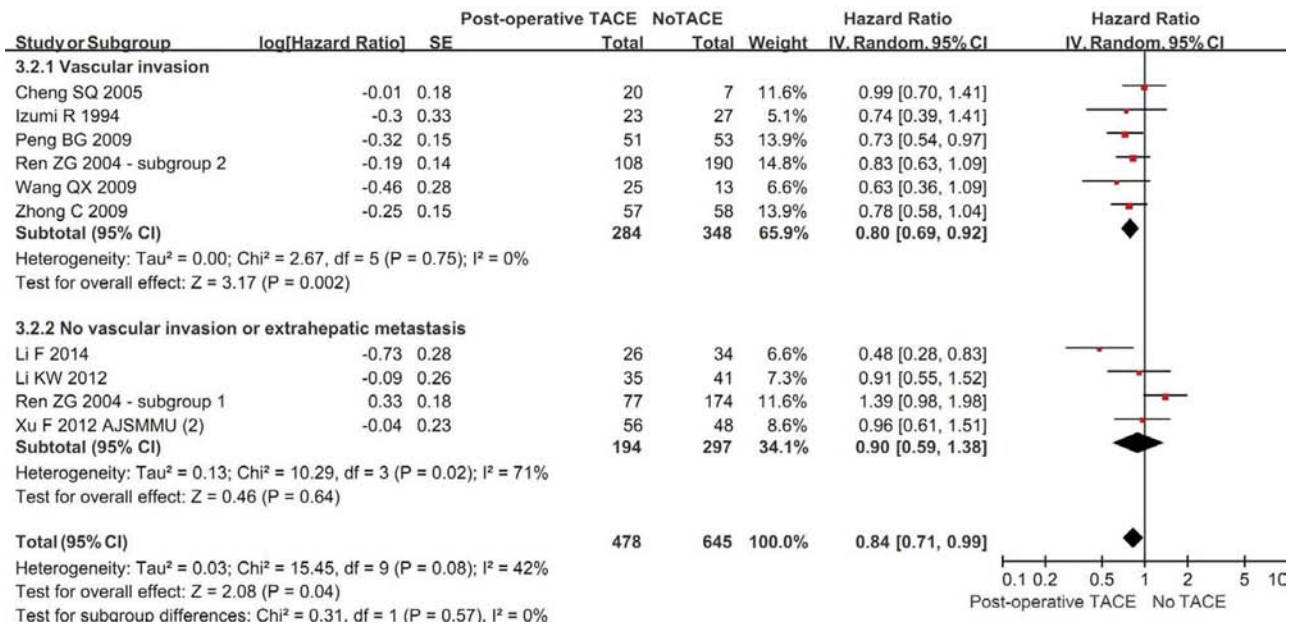

**Supplementary Figure S12: Subgroup meta-analysis comparing the overall survival between hepatic resection with and without post-operative TACE groups according to the vascular invasion.**

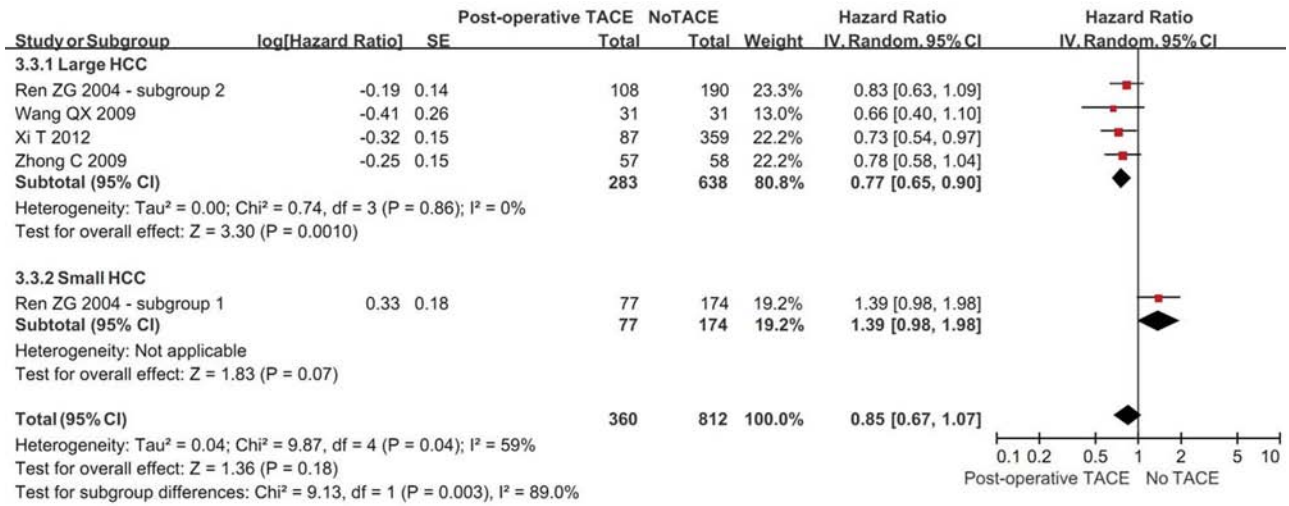

Supplementary Figure S13: Subgroup meta-analysis comparing the overall survival between hepatic resection with and without post-operative TACE groups according to the tumor size.

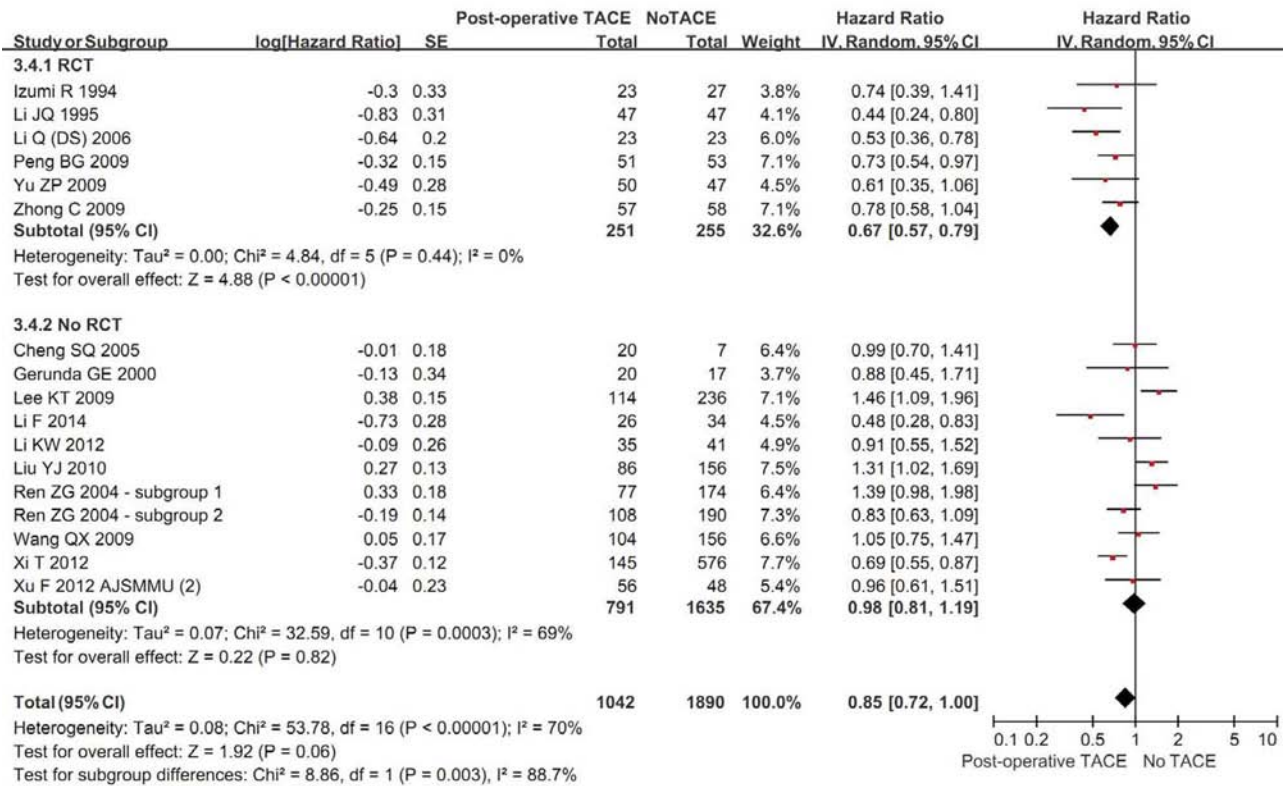

Supplementary Figure S14: Subgroup meta-analysis comparing the overall survival between hepatic resection with and without post-operative TACE groups according to the study design.

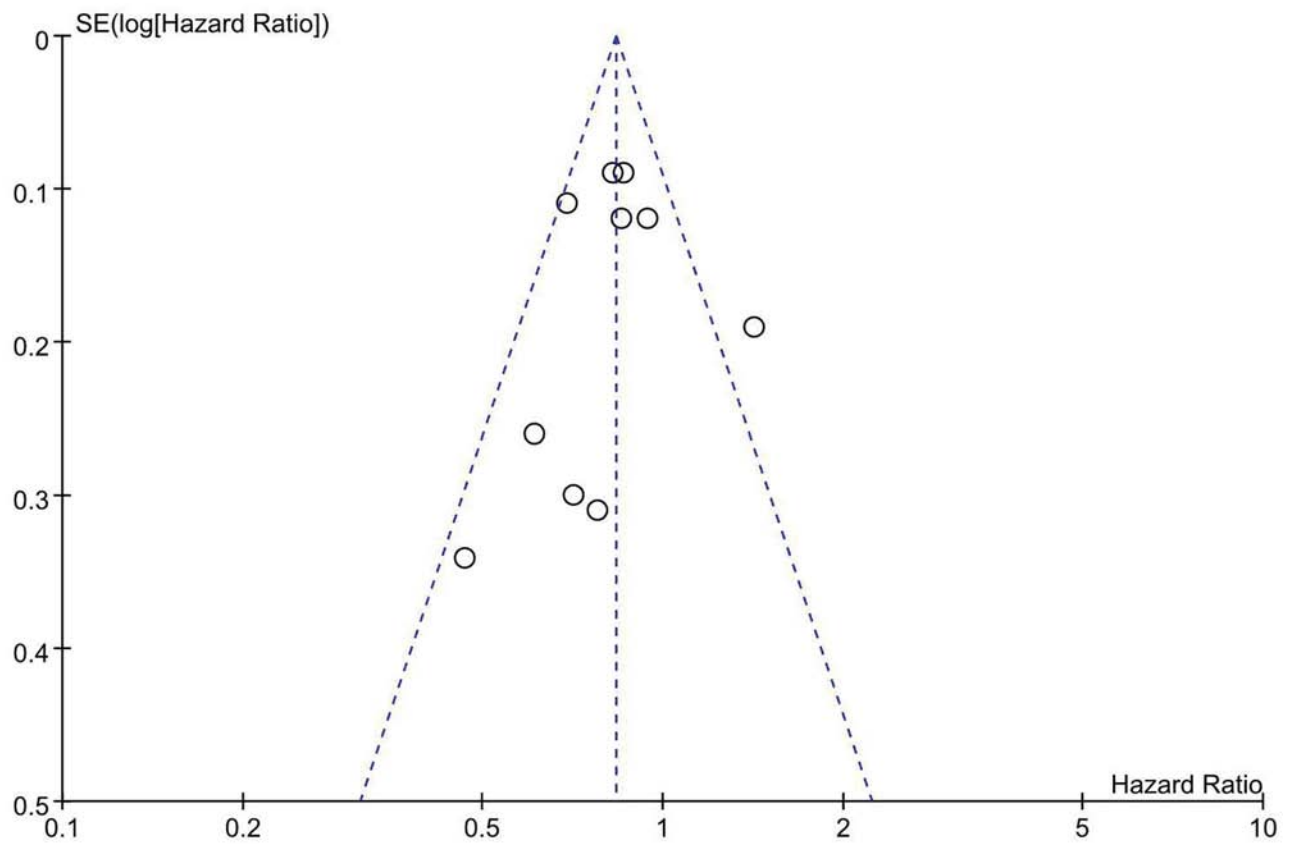

Supplementary Figure S15: Funnel plot regarding the comparison of disease-free survival between hepatic resection with and without post-operative TACE groups.



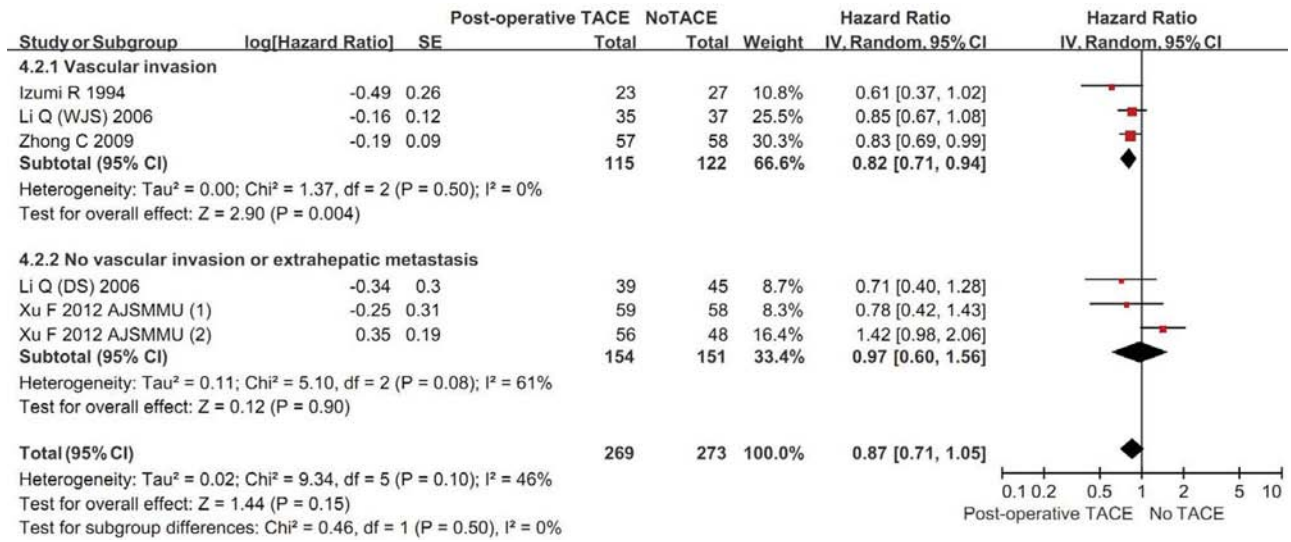

Supplementary Figure S16: Subgroup meta-analysis comparing the disease-free survival between hepatic resection with and without post-operative TACE groups according to the vascular invasion.

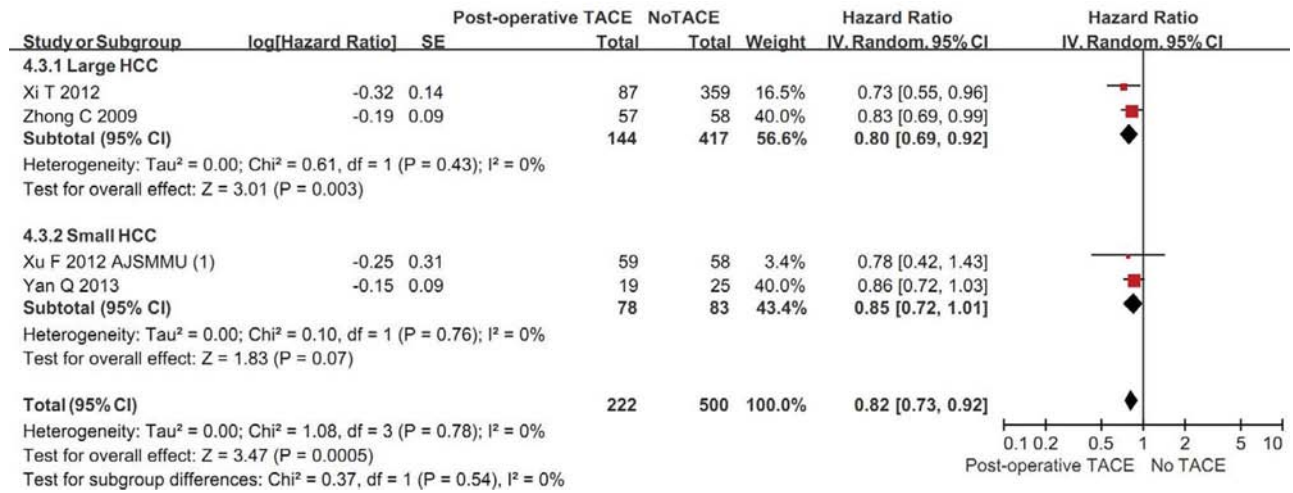

**Supplementary Figure S17: Subgroup meta-analysis comparing the disease-free survival between hepatic resection with and without post-operative TACE groups according to the tumor size.**

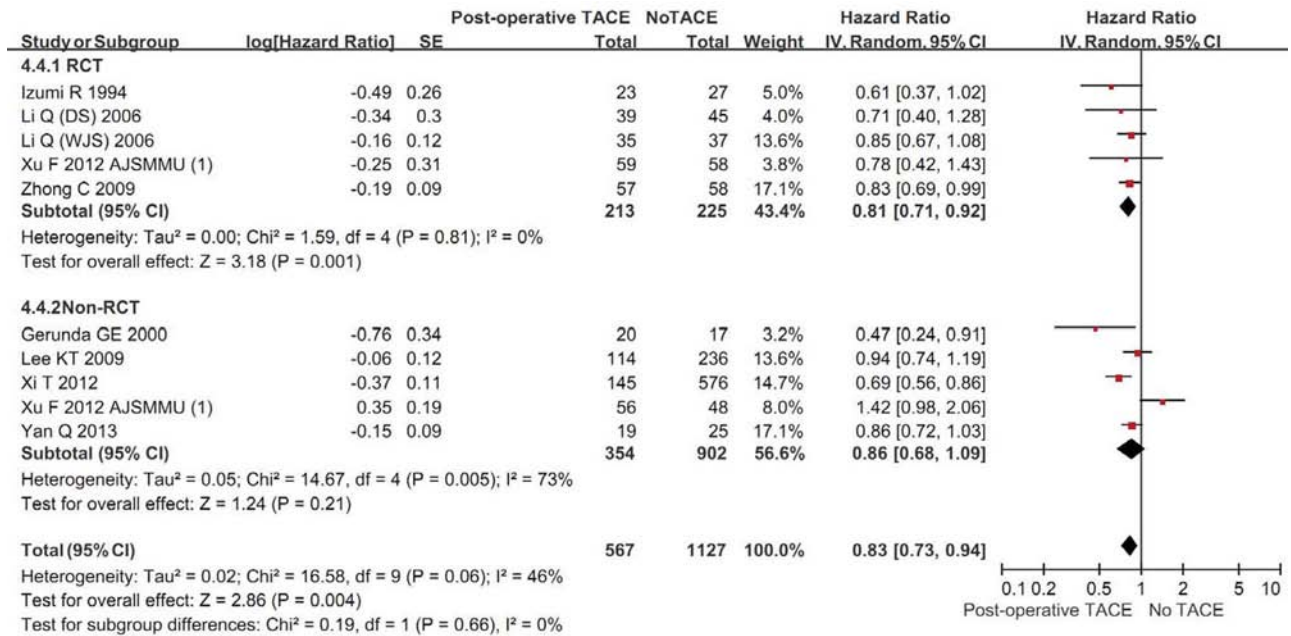

Supplementary Figure S18: Subgroup meta-analysis comparing the disease-free survival between hepatic resection with and without post-operative TACE groups according to the study design.

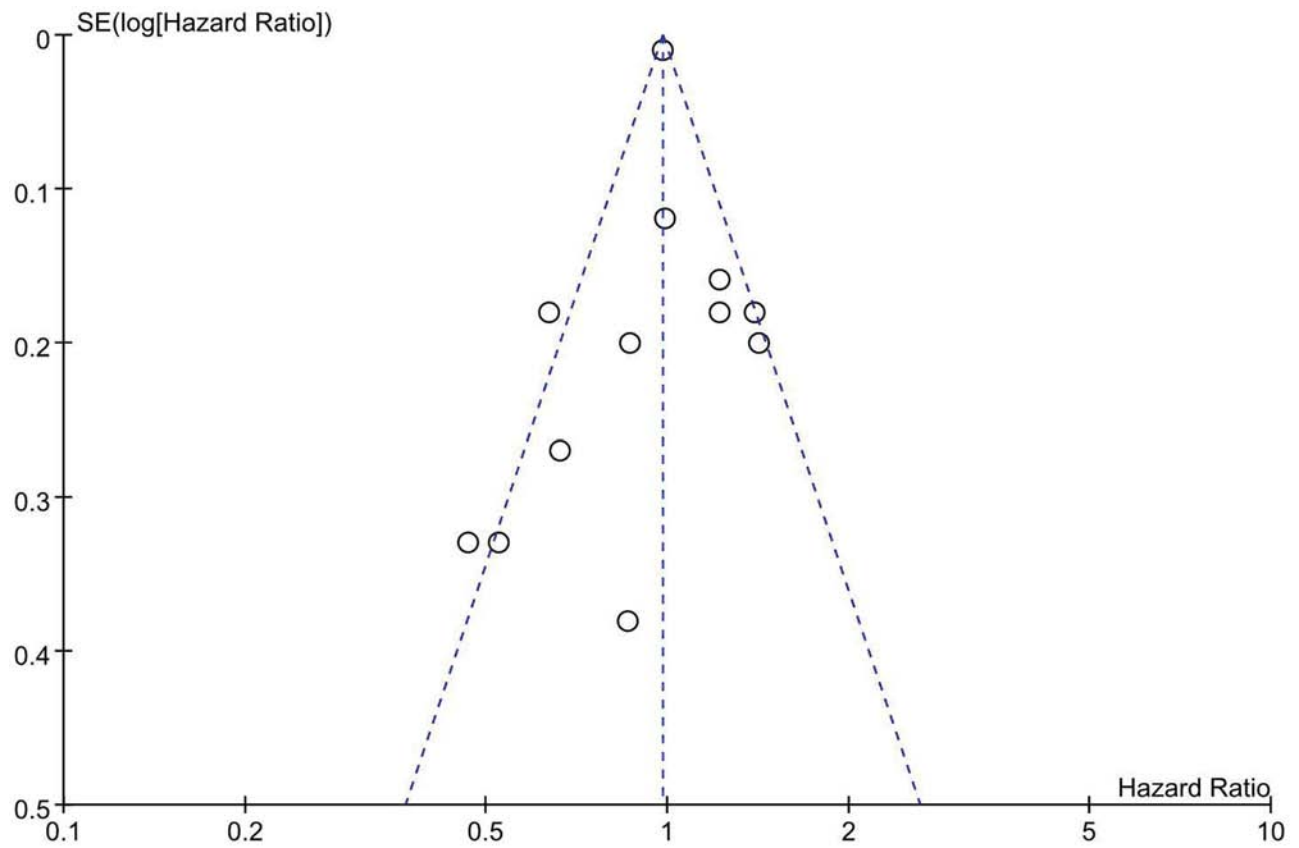

Supplementary Figure S19: Funnel plot regarding the comparison of rate free of recurrence between hepatic resection with and without post-operative TACE groups.

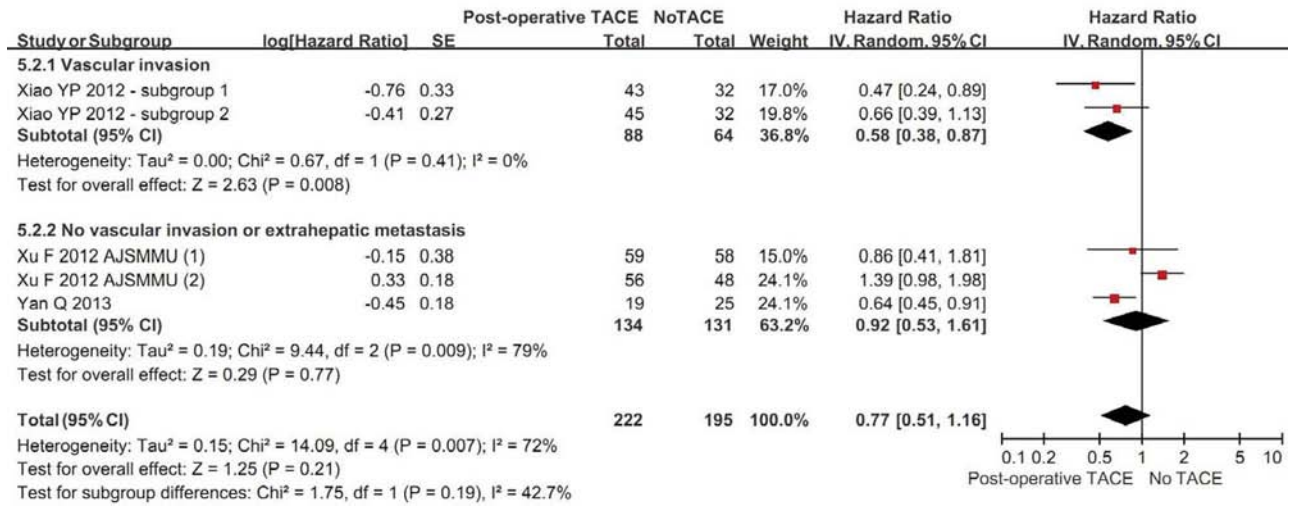

**Supplementary Figure S20: Subgroup meta-analysis comparing the rate free of recurrence between hepatic resection with and without post-operative TACE groups according to the vascular invasion.**

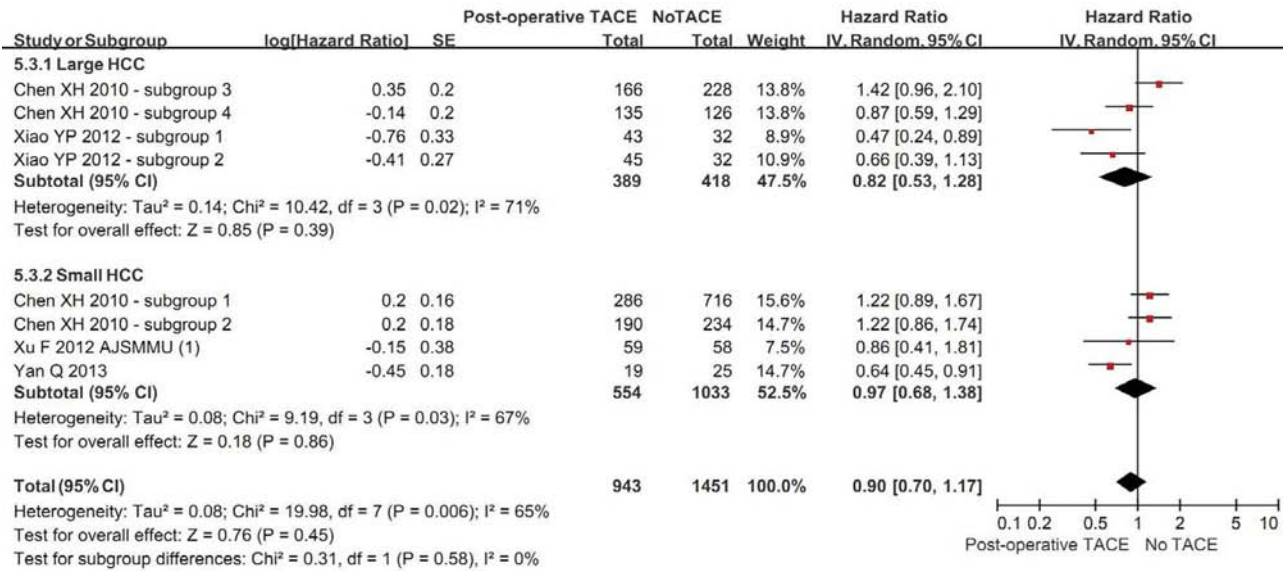

**Supplementary Figure S21: Subgroup meta-analysis comparing the rate free of recurrence between hepatic resection with and without post-operative TACE groups according to the tumor size.**

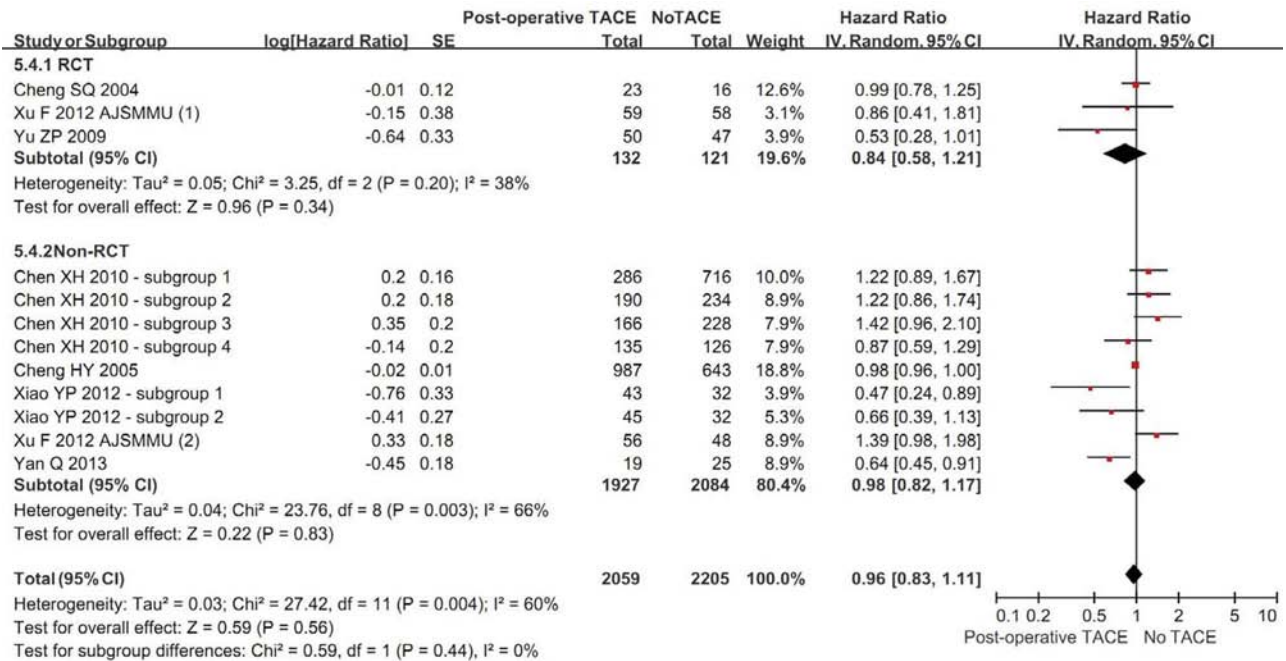

Supplementary Figure S22: Subgroup meta-analysis comparing the rate free of recurrence between hepatic resection with and without post-operative TACE groups according to the study design.



**Supplementary Table S1: Quality assessment of non-randomized studies using NEWCASTLE - OTTAWA QUALITY ASSESSMENT SCALE COHORT STUDIES**

| First Author, Journal (Year)               | Q1      | Q2      | Q3      | Q4      | Q5       | Q6      | Q7      | Q8      | Total score |
|--------------------------------------------|---------|---------|---------|---------|----------|---------|---------|---------|-------------|
| Adachi E, Cancer (1993)                    | 1 point | 1 point | 0 point | 0 point | 1 point  | 0 point | 1 point | 0 point | 4 points    |
| Chen XH, Zhonghua Yi Xue Za Zhi (2010)     | 1 point | 1 point | 0 point | 0 point | 2 points | 1 point | 0 point | 1 point | 4 points    |
| Chen XP, Dig Surg (2007)                   | 0 point | 0 point | 0 point | 1 point | 2 points | 0 point | 1 point | 0 point | 5 points    |
| Cheng HY, Zhonghua Zhong Liu Za Zhi (2005) | 1 point | 1 point | 0 point | 0 point | 0 point  | 0 point | 0 point | 0 point | 2 points    |
| Cheng SQ, Zhonghua Zhong Liu Za Zhi (2005) | 1 point | 1 point | 0 point | 1 point | 2 points | 0 point | 1 point | 1 point | 7 points    |
| Choi GH, World J Surg (2007)               | 1 point | 1 point | 0 point | 1 point | 2 points | 1 point | 1 point | 1 point | 8 points    |
| Di Carlo V, Hepato-gastroenterology (1998) | 0 point | 0 point | 0 point | 0 point | 2 points | 0 point | 1 point | 0 point | 3 points    |
| Gerunda GE, Liver Transpl (2000)           | 1 point | 1 point | 0 point | 0 point | 2 points | 1 point | 1 point | 0 point | 6 points    |
| Hanazaki K, J Am Coll Surg (2000)          | 1 point | 1 point | 0 point | 0 point | 0 point  | 1 point | 1 point | 0 point | 4 points    |
| Harada T, Ann Surg (1996)                  | 1 point | 1 point | 0 point | 0 point | 2 points | 1 point | 1 point | 0 point | 6 points    |
| Jianyong L, Ann Hepatol (2014)             | 1 point | 1 point | 0 point | 0 point | 2 points | 1 point | 1 point | 0 point | 6 points    |
| Kaibori M, Anticancer Research (2006)      | 1 point | 1 point | 0 point | 0 point | 2 points | 1 point | 1 point | 0 point | 6 points    |
| Kim IS, Aliment Pharmacol Ther (2008)      | 1 point | 1 point | 0 point | 0 point | 2 points | 1 point | 1 point | 1 point | 7 points    |
| Kishi Y, Hepato-gastroenterology (2012)    | 1 point | 1 point | 0 point | 0 point | 1 point  | 1 point | 1 point | 0 point | 5 points    |
| Lee KT, J Surg Oncol (2009)                | 1 point | 1 point | 0 point | 0 point | 2 points | 1 point | 1 point | 0 point | 6 points    |
| Li F, Ir J Med Sci (2014)                  | 1 point | 1 point | 0 point | 0 point | 2 points | 0 point | 1 point | 0 point | 5 points    |

(Continued)

| First Author, Journal (Year)                              | Q1      | Q2      | Q3      | Q4      | Q5       | Q6      | Q7      | Q8      | Total score |
|-----------------------------------------------------------|---------|---------|---------|---------|----------|---------|---------|---------|-------------|
| Li KW, Hepato-gastroenterology (2012)                     | 1 point | 1 point | 0 point | 0 point | 2 points | 1 point | 1 point | 0 point | 6 points    |
| Liu YJ, Zhonghua Fang She Xue Za Zhi (2010)               | 1 point | 1 point | 0 point | 0 point | 2 points | 0 point | 1 point | 0 point | 5 points    |
| Lu CD, World J Surg (1999)                                | 1 point | 1 point | 0 point | 0 point | 2 points | 0 point | 1 point | 0 point | 5 points    |
| Majno PE, Ann Surg (1997)                                 | 1 point | 1 point | 0 point | 0 point | 0 point  | 0 point | 1 point | 0 point | 3 points    |
| Nagasue N, Surgery (1989)                                 | 1 point | 1 point | 0 point | 0 point | 1 point  | 0 point | 1 point | 0 point | 4 points    |
| Nishikawa H, Int J Oncol (2013)                           | 1 point | 1 point | 0 point | 0 point | 2 points | 1 point | 1 point | 0 point | 6 points    |
| Ochiai T, Hepato-gastroenterology (2003)                  | 1 point | 1 point | 0 point | 0 point | 2 points | 1 point | 1 point | 0 point | 6 points    |
| Park JH, Cardiovasc Intervent Radiol (1993)               | 1 point | 1 point | 0 point | 0 point | 0 point  | 1 point | 1 point | 0 point | 4 points    |
| Sasaki A, Eur J Surg Oncol (2006)                         | 1 point | 1 point | 0 point | 0 point | 0 point  | 1 point | 1 point | 0 point | 4 points    |
| Sugo H, World J Surg (2003)                               | 1 point | 1 point | 0 point | 0 point | 1 point  | 1 point | 1 point | 0 point | 5 points    |
| Uchida M, World J Surg (1996)                             | 1 point | 1 point | 0 point | 0 point | 2 points | 0 point | 1 point | 0 point | 5 points    |
| Wang TH, Chinese J Cancer Prevention and Treatment (2010) | 1 point | 1 point | 0 point | 0 point | 2 points | 0 point | 1 point | 0 point | 5 points    |
| Wang QX, Zhonghua Wai Ke Za Zhi (2009)                    | 1 point | 1 point | 0 point | 0 point | 2 points | 1 point | 1 point | 0 point | 6 points    |
| Xi T, Hepato-gastroenterology (2012)                      | 1 point | 1 point | 0 point | 0 point | 2 points | 1 point | 1 point | 0 point | 6 points    |
| Xiao EH, Zhonghua Zhong Liu Za Zhi (2005)                 | 0 point | 0 point | 0 point | 0 point | 0 point  | 0 point | 1 point | 0 point | 1 point     |
| Xiao YP, World Chinese J Digestology (2012)               | 1 point | 1 point | 0 point | 0 point | 2 points | 1 point | 1 point | 0 point | 6 points    |

(Continued)

| First Author, Journal<br>(Year)                                    | Q1      | Q2      | Q3      | Q4      | Q5       | Q6      | Q7      | Q8      | Total score |
|--------------------------------------------------------------------|---------|---------|---------|---------|----------|---------|---------|---------|-------------|
| Xu F, Academic J<br>Second Military Medical<br>University (2012) 2 | 0 point | 0 point | 0 point | 1 point | 1 point  | 1 point | 1 point | 1 point | 5 points    |
| Yan Q, Chin Med J (2013)                                           | 1 point | 1 point | 0 point | 0 point | 2 points | 1 point | 1 point | 0 point | 6 points    |
| Yanaga K, HPB (2014)                                               | 0 point | 0 point | 0 point | 0 point | 0 point  | 0 point | 0 point | 0 point | 0 point     |
| Yang PS, Liver Transpl<br>(2010)                                   | 0 point | 0 point | 0 point | 0 point | 0 point  | 0 point | 1 point | 0 point | 1 point     |
| Zhang Z, Cancer (2000)                                             | 1 point | 1 point | 0 point | 0 point | 0 point  | 0 point | 1 point | 0 point | 3 points    |

**Supplementary Table S2: Quality assessment of non-randomized studies using NEWCASTLE - OTTAWA QUALITY ASSESSMENT SCALE CASE CONTROL STUDIES**

| <b>First Author,<br/>Journal (Year)</b>                 | <b>Q1</b> | <b>Q2</b> | <b>Q3</b> | <b>Q4</b> | <b>Q5</b> | <b>Q6</b> | <b>Q7</b> | <b>Q8</b> | <b>Total<br/>score</b> |
|---------------------------------------------------------|-----------|-----------|-----------|-----------|-----------|-----------|-----------|-----------|------------------------|
| <b>Kang JY,<br/>Korean J<br/>Hepatol (2010)</b>         | 0 point   | 0 point   | 0 point   | 1 point   | 2 points  | 1 point   | 1 point   | 0 point   | 5 points               |
| <b>Paye F, Arch<br/>Surg (1998)</b>                     | 0 point   | 1 point   | 0 point   | 1 point   | 2 points  | 1 point   | 1 point   | 0 point   | 6 points               |
| <b>Ren ZG,<br/>World J<br/>Gastroenterol<br/>(2004)</b> | 0 point   | 0 point   | 0 point   | 1 point   | 1 point   | 1 point   | 1 point   | 0 point   | 4 points               |
| <b>Shi HY, J Surg<br/>Oncol (2014)</b>                  | 1 point   | 1 point   | 1 point   | 1 point   | 0 point   | 0 point   | 0 point   | 0 point   | 4 points               |

**Supplementary Table S3: Quality assessment of randomized studies using the Cochrane Collaboration's risk of bias tool**

| <b>First Author, Journal (Year)</b>                              |                 |                                                                                                                                                                       |
|------------------------------------------------------------------|-----------------|-----------------------------------------------------------------------------------------------------------------------------------------------------------------------|
| <b>Cheng SQ, Zhonghua Zhong Liu Za Zhi (2004)</b>                |                 |                                                                                                                                                                       |
| <b>Entry</b>                                                     | <b>Judgment</b> | <b>Support for judgment</b>                                                                                                                                           |
| <b>Random sequence generation (selection bias)</b>               | High risk.      | Quote: "57 patients with HCC were randomly divided into three groups according to the order of hospitalization".                                                      |
| <b>Allocation concealment (selection bias)</b>                   | Unclear risk.   | Not described.                                                                                                                                                        |
| <b>Blinding of participants and personnel (performance bias)</b> | Unclear risk.   | Not described.                                                                                                                                                        |
| <b>Blinding of outcome assessment (detection bias)</b>           | Unclear risk.   | Not described.                                                                                                                                                        |
| <b>Incomplete outcome data addressed (attrition bias)</b>        | Unclear risk.   | Not described.                                                                                                                                                        |
| <b>Selective reporting (reporting bias)</b>                      | Low risk.       | Both recurrence and survival were reported. Review authors do not believe that bias will be introduced.                                                               |
| <b>First Author, Journal (Year)</b>                              |                 |                                                                                                                                                                       |
| <b>Izumi R, Hepatology (1994)</b>                                |                 |                                                                                                                                                                       |
| <b>Entry</b>                                                     | <b>Judgment</b> | <b>Support for judgment</b>                                                                                                                                           |
| <b>Random sequence generation (selection bias)</b>               | Unclear risk.   | Not described.                                                                                                                                                        |
| <b>Allocation concealment (selection bias)</b>                   | Unclear risk.   | Not described.                                                                                                                                                        |
| <b>Blinding of participants and personnel (performance bias)</b> | Unclear risk.   | Not described.                                                                                                                                                        |
| <b>Blinding of outcome assessment (detection bias)</b>           | Unclear risk.   | Not described.                                                                                                                                                        |
| <b>Incomplete outcome data addressed (attrition bias)</b>        | Unclear risk.   | Not described.                                                                                                                                                        |
| <b>Selective reporting (reporting bias)</b>                      | Low risk.       | Both DFS and survival were reported. Review authors do not believe that bias will be introduced.                                                                      |
| <b>First Author, Journal (Year)</b>                              |                 |                                                                                                                                                                       |
| <b>Kaibori M, Dig Dis Sci (2012)</b>                             |                 |                                                                                                                                                                       |
| <b>Entry</b>                                                     | <b>Judgment</b> | <b>Support for judgment</b>                                                                                                                                           |
| <b>Random sequence generation (selection bias)</b>               | Unclear risk.   | Quote: "They would be randomly selected for one of the above three groups". Comment: The authors did not mention the detailed methods for random sequence generation. |
| <b>Allocation concealment (selection bias)</b>                   | Low risk.       | Quote: "They were randomized by the envelope method".                                                                                                                 |
| <b>Blinding of participants and personnel (performance bias)</b> | Unclear risk.   | Not described.                                                                                                                                                        |
| <b>Blinding of outcome assessment (detection bias)</b>           | Unclear risk.   | Not described.                                                                                                                                                        |
| <b>Incomplete outcome data addressed (attrition bias)</b>        | Unclear risk.   | Not described.                                                                                                                                                        |
| <b>Selective reporting (reporting bias)</b>                      | Low risk.       | Both recurrence and survival were reported. Review authors do not believe that bias will be introduced.                                                               |

(Continued)

| First Author, Journal (Year)                              |               | Li JQ, J Cancer Res Clin Oncol (1995)                                                                                                                 |
|-----------------------------------------------------------|---------------|-------------------------------------------------------------------------------------------------------------------------------------------------------|
| Entry                                                     | Judgment      | Support for judgment                                                                                                                                  |
| Random sequence generation (selection bias)               | Unclear risk. | Quote: "140 patients were recruited to a randomized study". Comment: The authors did not mention the detailed methods for random sequence generation. |
| Allocation concealment (selection bias)                   | Unclear risk. | Not described.                                                                                                                                        |
| Blinding of participants and personnel (performance bias) | Unclear risk. | Not described.                                                                                                                                        |
| Blinding of outcome assessment (detection bias)           | Unclear risk. | Not described.                                                                                                                                        |
| Incomplete outcome data addressed (attrition bias)        | Unclear risk. | Not described.                                                                                                                                        |
| Selective reporting (reporting bias)                      | Low risk.     | Both recurrence and survival were reported. Review authors do not believe that bias will be introduced.                                               |
| First Author, Journal (Year)                              |               | Li Q, Dig surg (2006)                                                                                                                                 |
| Entry                                                     | Judgment      | Support for judgment                                                                                                                                  |
| Random sequence generation (selection bias)               | Low risk.     | Quote: "Random drawing of lots".                                                                                                                      |
| Allocation concealment (selection bias)                   | Unclear risk. | Not described.                                                                                                                                        |
| Blinding of participants and personnel (performance bias) | High risk.    | Quote: "a single-blind method". Comment: Review author did not recognize the detailed information regarding blinding of participants and personnel.   |
| Blinding of outcome assessment (detection bias)           | Unclear risk. | Not described.                                                                                                                                        |
| Incomplete outcome data addressed (attrition bias)        | Unclear risk. | Not described.                                                                                                                                        |
| Selective reporting (reporting bias)                      | Low risk.     | DFS was estimated according to the Methods. DFS was clearly reported in the Results. Review authors do not believe that bias will be introduced.      |
| First Author, Journal (Year)                              |               | Li Q, World J Surg (2006)                                                                                                                             |
| Entry                                                     | Judgment      | Support for judgment                                                                                                                                  |
| Random sequence generation (selection bias)               | Low risk.     | Quote: "The study cohort consisted of 112 patients with HCC and PVTT randomly divided into three groups". "The random drawing of lots".               |
| Allocation concealment (selection bias)                   | Unclear risk. | Not described.                                                                                                                                        |
| Blinding of participants and personnel (performance bias) | High risk.    | Quote: "a single-blind method". Comment: Review author did not recognize the detailed information regarding blinding of participants and personnel.   |
| Blinding of outcome assessment (detection bias)           | Unclear risk. | Not described.                                                                                                                                        |

(Continued)

|                                                                                                          |                 |                                                                                                                                                                                                                                                                               |
|----------------------------------------------------------------------------------------------------------|-----------------|-------------------------------------------------------------------------------------------------------------------------------------------------------------------------------------------------------------------------------------------------------------------------------|
| <b>Incomplete outcome data addressed (attrition bias)</b>                                                | Unclear risk.   | Not described.                                                                                                                                                                                                                                                                |
| <b>Selective reporting (reporting bias)</b>                                                              | Low risk.       | DFS was estimated according to the Methods. DFS was clearly reported in the Results. Review authors do not believe that bias will be introduced.                                                                                                                              |
| <b>First Author, Journal (Year)</b> <b>Peng BG, Am J Surg (2009)</b>                                     |                 |                                                                                                                                                                                                                                                                               |
| <b>Entry</b>                                                                                             | <b>Judgment</b> | <b>Support for judgment</b>                                                                                                                                                                                                                                                   |
| <b>Random sequence generation (selection bias)</b>                                                       | Low risk.       | Quote: "All patients were randomly assigned into the control group and the TACE group". "computer-generated random numbers".                                                                                                                                                  |
| <b>Allocation concealment (selection bias)</b>                                                           | Low risk.       | Quote: "Randomization was performed by means of sealed opaque envelopes containing computer-generated random numbers".                                                                                                                                                        |
| <b>Blinding of participants and personnel (performance bias)</b>                                         | Unclear risk.   | Not described.                                                                                                                                                                                                                                                                |
| <b>Blinding of outcome assessment (detection bias)</b>                                                   | Unclear risk.   | Not described.                                                                                                                                                                                                                                                                |
| <b>Incomplete outcome data addressed (attrition bias)</b>                                                | Low risk.       | Quote: "Twelve patients in the TACE group and 10 patients in the control group were lost during follow-up." Comments: Patients lost to follow-up balanced in numbers between groups, with similar reasons for missing data between groups.                                    |
| <b>Selective reporting (reporting bias)</b>                                                              | High risk.      | Quote: "When there was evidence of recurrence, enhanced computerized axial tomography (CAT) was employed to confirm the diagnosis". Comments: Despite recurrence was mentioned in the Methods section, the recurrence data during follow-up were not reported.                |
| <b>First Author, Journal (Year)</b> <b>Tang QH, Academic J Second Military Medical University (2009)</b> |                 |                                                                                                                                                                                                                                                                               |
| <b>Entry</b>                                                                                             | <b>Judgment</b> | <b>Support for judgment</b>                                                                                                                                                                                                                                                   |
| <b>Random sequence generation (selection bias)</b>                                                       | Low risk.       | Quote: "prospectively randomized into surgical resection group or preoperative TACE group" "computer-generated random numbers".                                                                                                                                               |
| <b>Allocation concealment (selection bias)</b>                                                           | High risk.      | Quote: "numbered according to the date of hospitalization".                                                                                                                                                                                                                   |
| <b>Blinding of participants and personnel (performance bias)</b>                                         | High risk.      | Quote: "patients, their relatives, nurses did not know the the detailed treatment".                                                                                                                                                                                           |
| <b>Blinding of outcome assessment (detection bias)</b>                                                   | Low risk.       | Quote: "Data were analyzed by two statisticians independently". "Statisticians did not know the assignment of groups".                                                                                                                                                        |
| <b>Incomplete outcome data addressed (attrition bias)</b>                                                | High risk.      | Quote: "52 patients were assigned to TACE+surgery group, but 5 patients did not undergo surgery after TACE due to the extrahepatic metastasis (n = 4) and liver function deterioration (n = 1)." "56 patients were assigned to surgery group, all of them underwent surgery". |
| <b>Selective reporting (reporting bias)</b>                                                              | Low risk.       | Both DFS and survival were reported. Review authors do not believe that bias will be introduced.                                                                                                                                                                              |

(Continued)



| First Author, Journal (Year)                              |               | Wu CC, Br J Surg (1995)                                                                                                                                |
|-----------------------------------------------------------|---------------|--------------------------------------------------------------------------------------------------------------------------------------------------------|
| Entry                                                     | Judgment      | Support for judgment                                                                                                                                   |
| Random sequence generation (selection bias)               | Unclear risk. | Quote: "The 52 patients were randomized into two groups".<br>Comment: The authors did not mention the detailed methods for random sequence generation. |
| Allocation concealment (selection bias)                   | Unclear risk. | Not described.                                                                                                                                         |
| Blinding of participants and personnel (performance bias) | Unclear risk. | Not described.                                                                                                                                         |
| Blinding of outcome assessment (detection bias)           | Unclear risk. | Not described.                                                                                                                                         |
| Incomplete outcome data addressed (attrition bias)        | Unclear risk. | Not described.                                                                                                                                         |
| Selective reporting (reporting bias)                      | Low risk.     | Both DFS and survival were reported. Review authors do not believe that bias will be introduced.                                                       |
| First Author, Journal (Year)                              |               | Xu F, Academic J Second Military Medical University (2012)                                                                                             |
| Entry                                                     | Judgment      | Support for judgment                                                                                                                                   |
| Random sequence generation (selection bias)               | Low risk.     | Quote: "117 patients were randomly divided into 2 groups".<br>"computer-generated random numbers".                                                     |
| Allocation concealment (selection bias)                   | High risk.    | Quote: "a list of random numbers, in which the first 60 were assigned to the TACE+surgery group, and the other 60 were assigned to the TACE group".    |
| Blinding of participants and personnel (performance bias) | Unclear risk. | Not described.                                                                                                                                         |
| Blinding of outcome assessment (detection bias)           | Unclear risk. | Not described.                                                                                                                                         |
| Incomplete outcome data addressed (attrition bias)        | Low risk.     | Quote: "None of patients were lost to follow-up".                                                                                                      |
| Selective reporting (reporting bias)                      | Low risk.     | DFS was estimated according to the Methods. DFS was clearly reported in the Results. Review authors do not believe that bias will be introduced.       |
| First Author, Journal (Year)                              |               | Yamasaki S, Jpn J Cancer Res (1996)                                                                                                                    |
| Entry                                                     | Judgment      | Support for judgment                                                                                                                                   |
| Random sequence generation (selection bias)               | Unclear risk. | Not described.                                                                                                                                         |
| Allocation concealment (selection bias)                   | Unclear risk. | Quote: "Patients were randomized using the envelop method".<br>Comment: it remains unclear about whether or not envelop was sealed or opaque.          |
| Blinding of participants and personnel (performance bias) | Unclear risk. | Not described.                                                                                                                                         |
| Blinding of outcome assessment (detection bias)           | Unclear risk. | Not described.                                                                                                                                         |

(Continued)

|                                                                             |                 |                                                                                                                                                                                                                                                                                                                          |
|-----------------------------------------------------------------------------|-----------------|--------------------------------------------------------------------------------------------------------------------------------------------------------------------------------------------------------------------------------------------------------------------------------------------------------------------------|
| <b>Incomplete outcome data addressed (attrition bias)</b>                   | Unclear risk.   | Not described.                                                                                                                                                                                                                                                                                                           |
| <b>Selective reporting (reporting bias)</b>                                 | Low risk.       | Both cancer-free survival and survival rates were reported. Review authors do not believe that bias will be introduced.                                                                                                                                                                                                  |
| <b>First Author, Journal (Year)</b> Yu ZP, J Pract Med (2009)               |                 |                                                                                                                                                                                                                                                                                                                          |
| <b>Entry</b>                                                                | <b>Judgment</b> | <b>Support for judgment</b>                                                                                                                                                                                                                                                                                              |
| <b>Random sequence generation (selection bias)</b>                          | Unclear risk.   | Not described.                                                                                                                                                                                                                                                                                                           |
| <b>Allocation concealment (selection bias)</b>                              | Unclear risk.   | Not described.                                                                                                                                                                                                                                                                                                           |
| <b>Blinding of participants and personnel (performance bias)</b>            | Unclear risk.   | Not described.                                                                                                                                                                                                                                                                                                           |
| <b>Blinding of outcome assessment (detection bias)</b>                      | Unclear risk.   | Not described.                                                                                                                                                                                                                                                                                                           |
| <b>Incomplete outcome data addressed (attrition bias)</b>                   | Low risk.       | Quote: "all patients have been followed for more than 2 years".                                                                                                                                                                                                                                                          |
| <b>Selective reporting (reporting bias)</b>                                 | Low risk.       | Both intrahepatic recurrence and survival rates were reported. Review authors do not believe that bias will be introduced.                                                                                                                                                                                               |
| <b>First Author, Journal (Year)</b> Zhong C, J Cancer Res Clin Oncol (2009) |                 |                                                                                                                                                                                                                                                                                                                          |
| <b>Entry</b>                                                                | <b>Judgment</b> | <b>Support for judgment</b>                                                                                                                                                                                                                                                                                              |
| <b>Random sequence generation (selection bias)</b>                          | Unclear risk.   | Quote: "A total of 118 patients were initially randomized to undergo partial hepatectomy and adjuvant TACE (HT arm) or partial hepatectomy alone (HA arm) by drawing consecutive sealed envelopes".Comment: The authors did not mention the detailed methods for random sequence generation.                             |
| <b>Allocation concealment (selection bias)</b>                              | Low risk.       | Quote: "drawing consecutive sealed envelopes".                                                                                                                                                                                                                                                                           |
| <b>Blinding of participants and personnel (performance bias)</b>            | Unclear risk.   | Not described.                                                                                                                                                                                                                                                                                                           |
| <b>Blinding of outcome assessment (detection bias)</b>                      | Unclear risk.   | Not described.                                                                                                                                                                                                                                                                                                           |
| <b>Incomplete outcome data addressed (attrition bias)</b>                   | Low risk.       | Quote: "1 patient in hepatectomy alone group was lost to follow-up".                                                                                                                                                                                                                                                     |
| <b>Selective reporting (reporting bias)</b>                                 | Low risk.       | Both DFS and survival were reported. Review authors do not believe that bias will be introduced.                                                                                                                                                                                                                         |
| <b>First Author, Journal (Year)</b> Zhou WP, Ann Surg (2009)                |                 |                                                                                                                                                                                                                                                                                                                          |
| <b>Entry</b>                                                                | <b>Judgment</b> | <b>Support for judgment</b>                                                                                                                                                                                                                                                                                              |
| <b>Random sequence generation (selection bias)</b>                          | Unclear risk.   | Quote: "All eligible patients were randomly assigned to either the preoperative TACE group or the control group by drawing sealed, consecutively numbered, and opaque envelopes after completing the preoperative evaluation". Comment: The authors did not mention the detailed methods for random sequence generation. |

(Continued)

|                                                                  |               |                                                                                                                                     |
|------------------------------------------------------------------|---------------|-------------------------------------------------------------------------------------------------------------------------------------|
| <b>Allocation concealment (selection bias)</b>                   | Low risk.     | Quote: “drawing sealed, consecutively numbered, and opaque envelopes”.                                                              |
| <b>Blinding of participants and personnel (performance bias)</b> | Unclear risk. | Not described.                                                                                                                      |
| <b>Blinding of outcome assessment (detection bias)</b>           | Unclear risk. | Not described.                                                                                                                      |
| <b>Incomplete outcome data addressed (attrition bias)</b>        | Low risk.     | Quote: “Five patients were lost to follow-up after discharge from hospital”. “A total of 108 patients were left for final analysis” |
| <b>Selective reporting (reporting bias)</b>                      | Low risk.     | Both DFS and survival were reported. Review authors do not believe that bias will be introduced.                                    |
